# Supplementary material
Source: ML conference proceedings conference paper supplement (https://openreview.net/forum?id=mZn2Xyh9Ec)

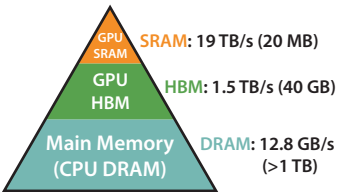

Memory Hierarchy with Bandwidth & Memory Size

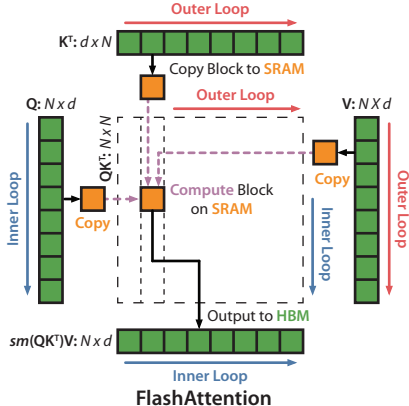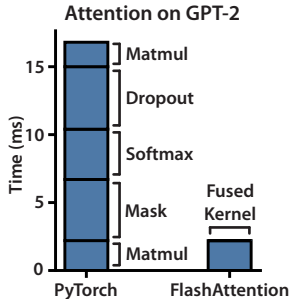

Supplement: supplementary_material [file attachment]
